# Supplementary material
Source: PubMed Central journal article supplement (PMC6390646)
Supplement: Supp_Table1.pdf [file Supp_Table1.pdf]

## Supplementary Data

SUPPLEMENTARY TABLE S1. CPT AND LABORATORY CODES FOR PAP AND HPV SCREENING TESTS

| <i>Code</i>                 | <i>Description</i>                                                                                                                                                                                                                                |
|-----------------------------|---------------------------------------------------------------------------------------------------------------------------------------------------------------------------------------------------------------------------------------------------|
| CPT codes for Pap screening |                                                                                                                                                                                                                                                   |
| 88141                       | Cytopathology, cervical or vaginal (any reporting system), requiring interpretation by physician                                                                                                                                                  |
| 88142                       | Cytopathology, cervical or vaginal (any reporting system), collected in preservative fluid, automated thin-layer preparation; manual screening under physician supervision                                                                        |
| 88143                       | Cytopathology, cervical or vaginal (any reporting system), collected in preservative fluid, automated thin-layer preparation; with manual screening and rescreening under physician supervision                                                   |
| 88144                       | Cytopathology, cervical or vaginal (any reporting system), collected in preservative fluid, automated thin-layer preparation; with manual screening and computer-assisted rescreening under physician supervision                                 |
| 88145                       | Cytopathology, cervical or vaginal (any reporting system), collected in preservative fluid, automated thin-layer preparation; with manual screening and computer-assisted rescreening using cell selection and review under physician supervision |
| 88147                       | Cytopathology smears, cervical or vaginal; screening by automated system under physician supervision                                                                                                                                              |
| 88148                       | Cytopathology smears, cervical or vaginal; screening by automated system with manual rescreening under physician supervision                                                                                                                      |
| 88150                       | Cytopathology, slides, cervical or vaginal; manual screening under physician supervision                                                                                                                                                          |
| 88151                       | Cytopathology, smears, cervical or vaginal, up to three smears; requiring interpretation by physician                                                                                                                                             |
| 88152                       | Cytopathology, slides, cervical or vaginal; with manual screening and computer-assisted rescreening under physician supervision                                                                                                                   |
| 88153                       | Cytopathology, slides, cervical or vaginal; with manual screening and rescreening under physician supervision                                                                                                                                     |
| 88154                       | Cytopathology, slides, cervical or vaginal; with manual screening and computer-assisted rescreening using cell selection and review under physician supervision                                                                                   |
| 88155                       | Cytopathology, slides, cervical or vaginal, definitive hormonal evaluation ( <i>e.g.</i> , maturation index, karyopyknotic index, estrogenic index) (List separately in addition to code[s] for other technical and interpretation services)      |
| 88156                       | Cytopathology, smears, cervical or vaginal, (the Bethesda System (TBS)), up to three smears; screening by technician under physician supervision                                                                                                  |
| 88157                       | Cytopathology, smears, cervical or vaginal, (the Bethesda System [TBS]), up to three smears; requiring interpretation by physicians                                                                                                               |
| 88158                       | Cytopathology, smears, cervical or vaginal, (the Bethesda System (TBS)), up to three smears; with manual cytotechnologist screening and automated rescreening under physician supervision                                                         |
| 88164                       | Cytopathology, slides, cervical or vaginal (the Bethesda System); manual screening under physician supervision                                                                                                                                    |
| 88165                       | Cytopathology, slides, cervical or vaginal (the Bethesda System); with manual screening and rescreening under physician supervision                                                                                                               |
| 88166                       | Cytopathology, slides, cervical or vaginal (the Bethesda System); with manual screening and computer-assisted rescreening under physician supervision                                                                                             |
| 88167                       | Cytopathology, slides, cervical or vaginal (the Bethesda System); with manual screening and computer-assisted rescreening using cell selection and review under physician supervision                                                             |
| 88174                       | Cytopathology, cervical or vaginal (any reporting system), collected in preservative fluid, automated thin-layer preparation; screening by automated system, under physician supervision                                                          |
| 88175                       | Cytopathology, cervical or vaginal (any reporting system), collected in preservative fluid, automated thin-layer preparation; with screening by automated system and manual rescreening or review, under physician supervision                    |
| P3000                       | Screening papanicolaou smear, cervical or vaginal, up to three smears, by technician under physician supervision                                                                                                                                  |
| P3001                       | Screening papanicolaou smear, cervical or vaginal, up to three smears, requiring interpretation by physician                                                                                                                                      |
| G0123                       | Screening cytopathology, cervical or vaginal (any reporting system), collected in preservative fluid, automated thin-layer preparation, screening by cytotechnologist under physician supervision                                                 |
| G0124                       | Screening cytopathology, cervical or vaginal (any reporting system), collected in preservative fluid, automated thin-layer preparation, requiring interpretation by physician                                                                     |
| G0141                       | Screening cytopathology smears, cervical or vaginal, performed by automated system, with manual rescreening, requiring interpretation by physician                                                                                                |

*(continued)*

SUPPLEMENTARY TABLE S1. (CONTINUED)

| Code                               | Description                                                                                                                                                                                                                   |
|------------------------------------|-------------------------------------------------------------------------------------------------------------------------------------------------------------------------------------------------------------------------------|
| G0143                              | Screening cytopathology, cervical or vaginal (any reporting system), collected in preservative fluid, automated thin-layer preparation, with manual screening and rescreening by cytotechnologist under physician supervision |
| G0144                              | Screening cytopathology, cervical or vaginal (any reporting system), collected in preservative fluid, automated thin-layer preparation, with screening by automated system, under physician supervision                       |
| G0145                              | Screening cytopathology, cervical or vaginal (any reporting system), collected in preservative fluid, automated thin-layer preparation, with screening by automated system and manual rescreening under physician supervision |
| G0147                              | Screening cytopathology smears, cervical or vaginal, performed by automated system under physician supervision                                                                                                                |
| G0148                              | Screening cytopathology smears, cervical or vaginal, performed by automated system with manual rescreening                                                                                                                    |
| Q0091                              | Screening papanicolaou smear; obtaining, preparing and conveyance of cervical or vaginal smear to laboratory                                                                                                                  |
| Laboratory codes for HPV screening |                                                                                                                                                                                                                               |
| 21782-ROCLIS                       | HPV high-risk types                                                                                                                                                                                                           |
| 21785-ROCLIS                       | Specimen source (w/HPV)                                                                                                                                                                                                       |
| 21845-ROCLIS                       | HPV high-risk types                                                                                                                                                                                                           |
| 21846-ROCLIS                       | Specimen source (w/HPV Det)                                                                                                                                                                                                   |
| 35924-ROCMIC                       | HPV high-risk type 16, PCR                                                                                                                                                                                                    |
| 35925-ROCMIC                       | HPV high-risk type 18, PCR                                                                                                                                                                                                    |
| 35926-ROCMIC                       | HPV other high-risk types, PCR                                                                                                                                                                                                |
| 83344-ROCMIC                       | HPV high-risk types                                                                                                                                                                                                           |
| SRC5-ROCMIC                        | Specimen source (high-risk HPV DNA)                                                                                                                                                                                           |
| SS017-ROCMIC                       | Specimen source (w/HPVR)                                                                                                                                                                                                      |
| SS018-ROCMIC                       | Specimen source (HPV with Geno)                                                                                                                                                                                               |
| 18758                              | Interpretation <i>in situ</i> DNA Hybrid. HPV typing                                                                                                                                                                          |
| 21782                              | HPV high-risk types                                                                                                                                                                                                           |
| 21845                              | HPV high-risk types                                                                                                                                                                                                           |
| 36003                              | HPV high-risk type 16, PCR                                                                                                                                                                                                    |
| 36004                              | HPV high-risk type 18, PCR                                                                                                                                                                                                    |
| 36005                              | HPV other high-risk types, PCR                                                                                                                                                                                                |
| SHPV                               | HPV high-risk DNA detection with genotyping                                                                                                                                                                                   |
| SS018                              | HPV specimen source                                                                                                                                                                                                           |
| CPT codes for HPV screening        |                                                                                                                                                                                                                               |
| 87620                              | Infectious agent detection by nucleic acid (DNA or RNA); papillomavirus, human, direct probe technique                                                                                                                        |
| 87621                              | Infectious agent detection by nucleic acid (DNA or RNA); papillomavirus, human, amplified probe technique                                                                                                                     |
| 87622                              | Infectious agent detection by nucleic acid (DNA or RNA); papillomavirus, human, quantification                                                                                                                                |
| 87624                              | Infectious agent detection by nucleic acid (DNA or RNA); HPV, high-risk types ( <i>e.g.</i> , 16, 18, 31, 33, 35, 39, 45, 51, 52, 56, 58, 59, 68)                                                                             |
| 87625                              | Infectious agent detection by nucleic acid (DNA or RNA); HPV, types 16 and 18 only, includes type 45, if performed                                                                                                            |
| G0476                              | Infectious agent detection by nucleic acid (DNA or RNA); HPV, high-risk types ( <i>e.g.</i> , 16, 18, 31, 33, 35, 39, 45, 51, 52, 56, 58, 59, 68) for cervical cancer screening, must be performed in addition to pap test    |
| G9806                              | Patients who received cervical cytology or an HPV test                                                                                                                                                                        |

HPV, human papillomavirus; Pap, Papanicolaou.
